# Supplementary material for: Trans-Pacific transport and evolution of aerosols: spatiotemporal characteristics and source contributions
Source: Copernicus journal article supplement (doi:10.5194/acp-19-12709-2019), 2019-10-10
Supplement: Supplementary file 1 [file acp-19-12709-2019-supplement.pdf]

Supplement of Atmos. Chem. Phys., 19, 12709–12730, 2019  
<https://doi.org/10.5194/acp-19-12709-2019-supplement>  
© Author(s) 2019. This work is distributed under  
the Creative Commons Attribution 4.0 License.

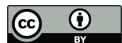

*Supplement of*

## **Trans-Pacific transport and evolution of aerosols: spatiotemporal characteristics and source contributions**

**Zhiyuan Hu et al.**

*Correspondence to:* Jianping Huang ([hjp@lzu.edu.cn](mailto:hjp@lzu.edu.cn))

The copyright of individual parts of the supplement might differ from the CC BY 4.0 License.

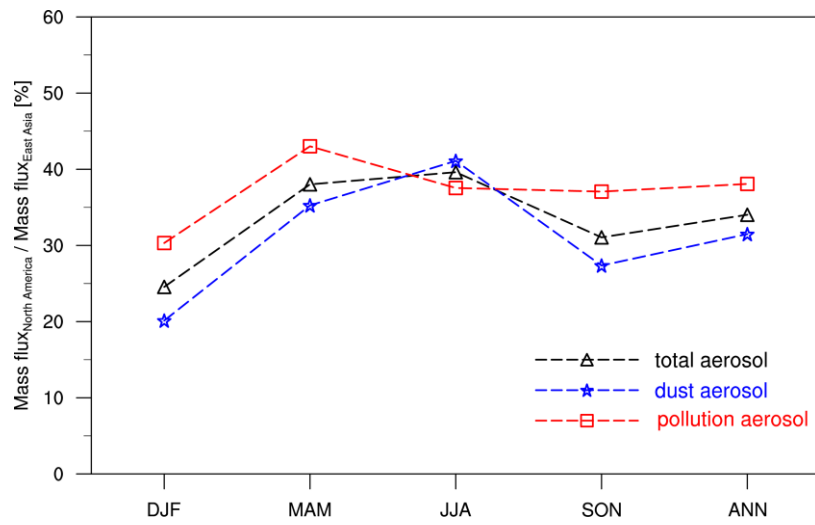

**Figure S1.** The transport efficiency of aerosol mass flux arriving into North America vs that leaving East Asia in seasonal and annual from total aerosol (included dust, sulfate, nitrate, organic matter, black carbon and ammonium), dust, and pollution aerosol (included sulfate, nitrate, organic matter, black carbon and ammonium).

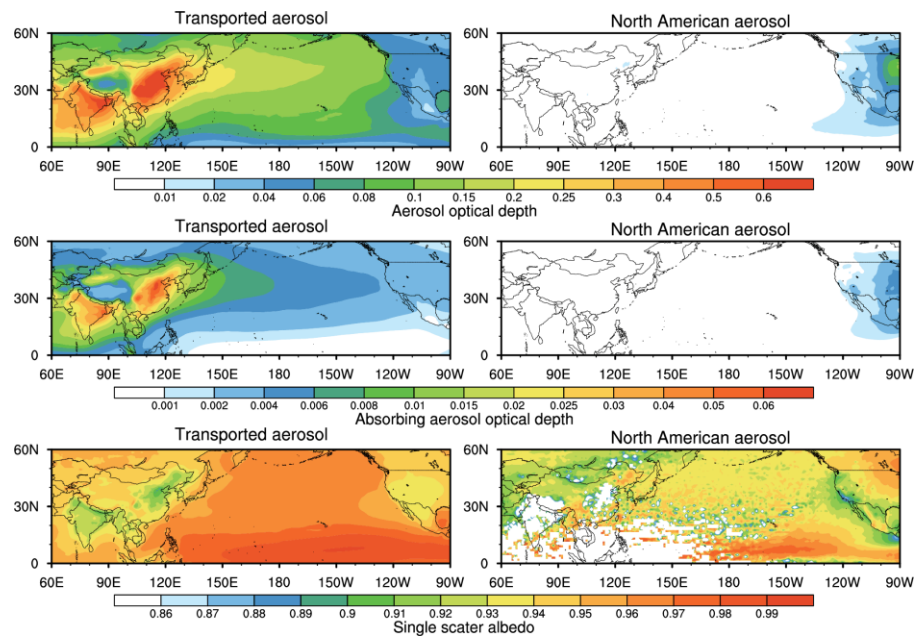

**Figure S2.** Spatial distribution of aerosol optical depth, absorbing aerosol optical depth, and single scatter albedo from the transported aerosol and North American aerosol. The WRF-Chem simulation is averaged for 2010-2014.
